# Supplementary material for: Fear of COVID-19 Predicts Depression, Anxiety and Post-Traumatic Stress Disorders in Patients with Implantable Cardioverter Defibrillators and Is Mediated by Positive and Negative Affects—A Cross-Sectional Study
Source: MDPI journal article supplement (doi:10.3390/jcm12216884), 2023-10-31
Supplement: s1 [file s1]

**Table S1.** Binary logistic regression for GAD (GAD-7  $\geq 10$ ), MDD (PHQ-8  $\geq 10$ ) and PTSD (PDS  $\geq 14$ ) in patients with an ICD – inclusion of further COVID-19 related variables.

| Variables                                           | GAD                   |              | MDD                  |                  | PTSD                 |                  |
|-----------------------------------------------------|-----------------------|--------------|----------------------|------------------|----------------------|------------------|
|                                                     | OR (95% CI)           | p-value      | OR (95% CI)          | p-value          | OR (95% CI)          | p-value          |
| Male sex                                            | 0.77 (0.28 to 2.12)   | 0.614        | 0.67 (0.24 to 1.90)  | 0.457            | 1.06 (0.44 to 2.53)  | 0.894            |
| Age                                                 | 0.94 (0.91 to 0.98)   | <b>0.013</b> | 0.97 (0.93 to 1.01)  | 0.169            | 0.92 (0.88 to 0.95)  | <b>&lt;0.001</b> |
| Higher educational status                           | 0.67 (0.39 to 1.14)   | 0.148        | 1.01 (0.62 to 1.62)  | 0.965            | 0.76 (0.49 to 1.18)  | 0.228            |
| Social support                                      | 0.91 (0.85 to 0.98)   | <b>0.016</b> | 0.88 (0.83 to 0.94)  | <b>&lt;0.001</b> | 0.90 (0.85 to 0.96)  | <b>0.003</b>     |
| ICD shock number                                    | 1.04 (0.99 to 1.10)   | 0.074        | 1.04 (0.99 to 1.10)  | 0.079            | 1.05 (0.99 to 1.10)  | 0.066            |
| History of COVID-19                                 | 1.52 (0.43 to 5.34)   | 0.507        | 2.87 (1.01 to 8.16)  | <b>0.047</b>     | 1.82 (0.63 to 5.29)  | 0.266            |
| Level of fear of COVID-19                           | 1.11 (1.03 to 1.19)   | <b>0.005</b> | 1.13 (1.04 to 1.21)  | <b>0.001</b>     | 1.15 (1.07 to 1.23)  | <b>&lt;0.001</b> |
| Being unemployed                                    | 10.18 (2.22 to 46.62) | <b>0.003</b> | 5.21 (1.30 to 20.76) | <b>0.019</b>     | 3.36 (0.88 to 12.78) | 0.075            |
| History of COVID-19 of a closely related person     | 1.88 (0.38 to 9.31)   | 0.436        | 2.63 (0.53 to 12.87) | 0.233            | 0.75 (0.23 to 2.46)  | 0.644            |
| Feeling well-informed about COVID-19 by authorities | 0.49 (0.16 to 1.51)   | 0.217        | 0.29 (0.11 to 0.76)  | <b>0.012</b>     | 0.46 (0.18 to 1.19)  | 0.113            |
| Feeling well-informed about COVID-19 by employer    | 1.13 (0.28 to 4.61)   | 0.855        | 0.48 (0.15 to 1.52)  | 0.219            | 0.91 (0.27 to 3.09)  | 0.886            |
| Nagelkerke R <sup>2</sup>                           | 0.29                  |              | 0.31                 |                  | 0.33                 |                  |

Note: OR: odds ratio. CI: confidence interval. MDD: major depressive disorder. Significant p-values are marked bold.
